# Supplementary material for: Intraoperative estimation of liver boundary conditions from multiple partial surfaces
Source: PubMed Central journal article supplement (PMC10329628; doi:10.1007/s11548-023-02964-5), 2023-06-01
Supplement: 11548_2023_2964_MOESM1_ESM.pdf [file 11548_2023_2964_MOESM1_ESM.pdf]

# Intraoperative Estimation of Liver Boundary Conditions from Multiple Partial Surfaces

Andrea Mendizabal<sup>1\*</sup>, Eleonora Tagliabue<sup>1</sup> and Diego Dall'Alba<sup>1</sup>

<sup>1</sup>Dept. of Computer Science, University of Verona, Verona, Italy.

\*Corresponding author(s). E-mail(s): [an.men.ec@gmail.com](mailto:an.men.ec@gmail.com);

## Supplementary material

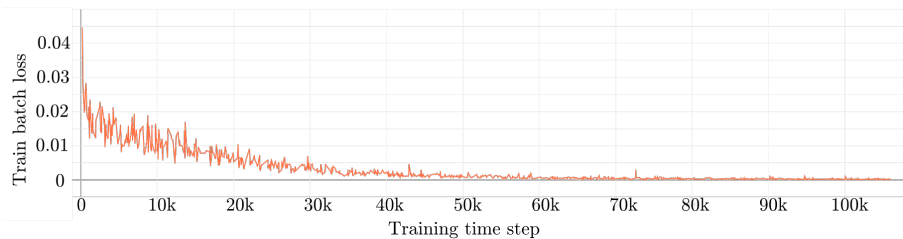

**Fig. 1** Training loss curve. The loss used to train the network is a linear combination between the Dice similarity coefficient and binary cross entropy  $L = \frac{1}{N} \sum_1^N (1 - DSC + BCE)$ .
